# Supplementary material for: Multi-block copolymers with fluorene-containing hydrophilic segments densely functionalized by side-chain quaternary ammonium groups as anion exchange membranes
Source: Royal Society of Chemistry journal article supplement (doi:10.1039/c6ra04989c), 2016-01-01
Supplement: c6ra04989c1.pdf [file c6ra04989c1.pdf]

## Supplementary information

### **Multi-block copolymers with fluorene-containing hydrophilic segments densely functionalized by side-chain quaternary ammonium groups as anion exchange membranes**

Lihong Li,<sup>ab</sup> Xi Yue,<sup>ab</sup> Wenjun Wu,<sup>ab</sup> Wuxin Yan,<sup>ab</sup> Mingjian Zeng,<sup>ab</sup> You Zhou,<sup>ab</sup> Shijun Liao<sup>ab</sup> and Xiuhua Li<sup>\*ab</sup>

<sup>a</sup> School of Chemistry & Chemical Engineering, South China University of Technology, Guangzhou 510641, P. R. China.

<sup>b</sup> The Key Laboratory of Fuel Cell Technology of Guangdong Province, South China University of Technology, Guangzhou 510641, P. R. China.

### **Corresponding Author**

\* Tel & Fax: 8620 – 22236591. E-mail: [lixihua@scut.edu.cn](mailto:lixihua@scut.edu.cn)

**I. Figures and tables**

**II. Experimental section**

## I. Figures and tables

**Fig. S1**  $^1\text{H}$  NMR spectra of the oligomer-Fs (a)  $X = 5$  and (b)  $X = 7$ .

**Fig. S2**  $^1\text{H}$  NMR spectra of oligomer-OHs (a)  $Y = 10$ , (b)  $Y = 13$  and (c)  $Y = 17$ .

**Fig. S3**  $^1\text{H}$  NMR spectra of (a) BrMPAES-X5Y10, (b) BrMPAES-X5Y13, (c) BrMPAES-X5Y17, (d) BrMPAES-X7Y10, (e) BrMPAES-X7Y13 and (f) BrMPAES-X7Y17.

**Fig. S4** AFM pattern of QMPAES-X5Y10

**Table S1**  $\text{IEC}_m$ ,  $\text{IEC}_{\text{wet}}$ ,  $\sigma$ ,  $\sigma/\text{IEC}_m$ ,  $\sigma/\text{IEC}_{\text{wet}}$  of the QMPAESs membranes and some reported AEMs.

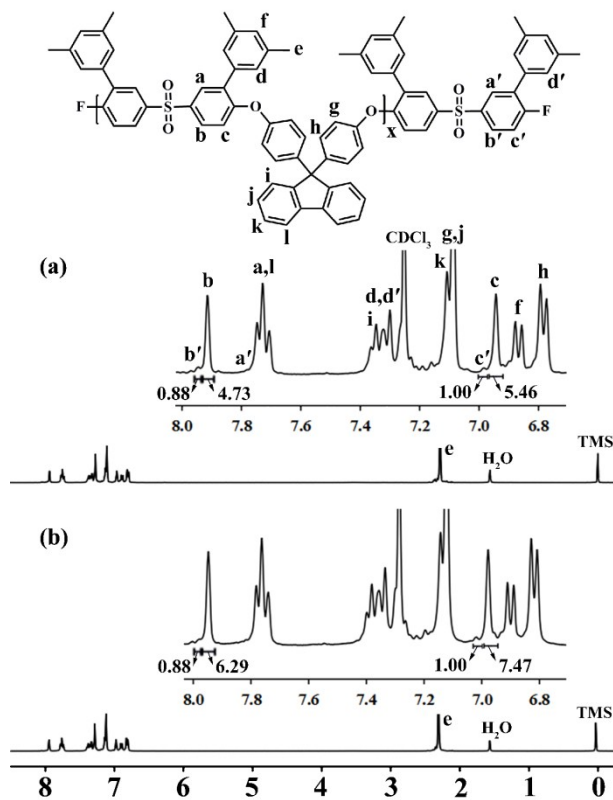

Fig. S1  $^1\text{H}$  NMR spectra of the oligomer-Fs (a)  $X = 5$  and (b)  $X = 7$ .

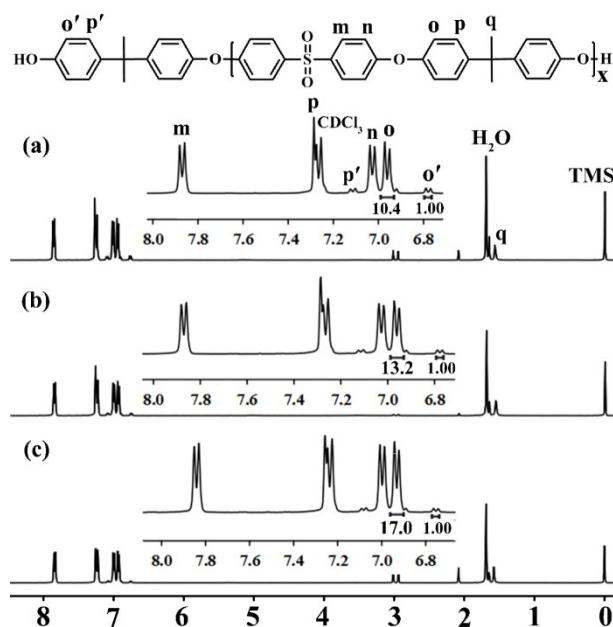

Fig. S2  $^1\text{H}$  NMR spectra of oligomer-OHs (a)  $Y = 10$ , (b)  $Y = 13$  and (c)  $Y = 17$ .

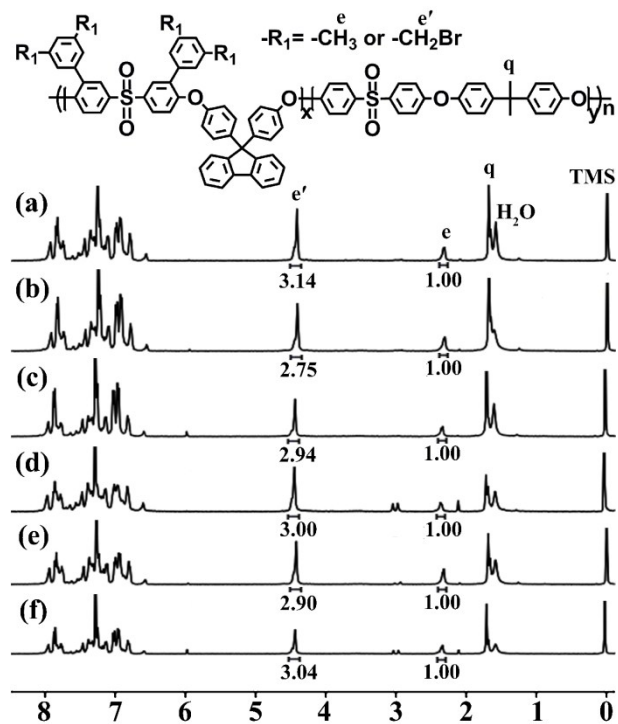

**Fig. S3** <sup>1</sup>H NMR spectra of (a) BrMPAES-X5Y10, (b) BrMPAES-X5Y13, (c) BrMPAES-X5Y17, (d) BrMPAES-X7Y10, (e) BrMPAES-X7Y13 and (f) BrMPAES-X7Y17.

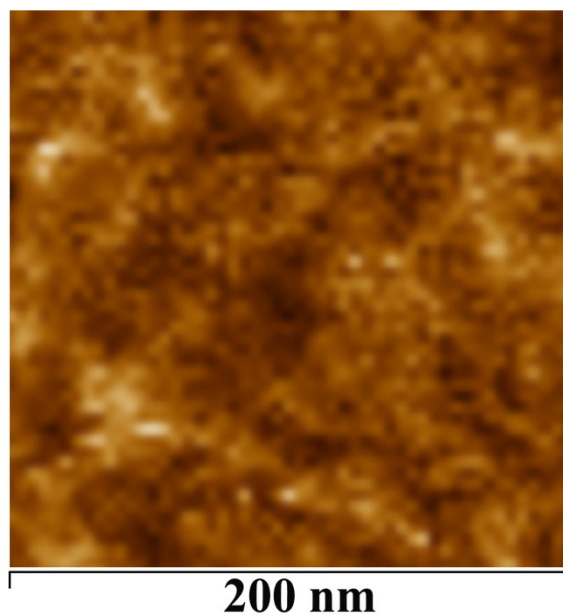

**Fig. S4** AFM pattern of QMPAES-X5Y10

**Table S1** IEC<sub>m</sub>, IEC<sub>wet</sub>,  $\sigma$ ,  $\sigma$ /IEC<sub>m</sub>,  $\sigma$ /IEC<sub>wet</sub> of the QMPAESs membranes and some reported AEMs

| Membrane                     | IEC <sub>m</sub><br>(meq g <sup>-1</sup> ) | IEC <sub>wet</sub><br>(meq cm <sup>-3</sup> ) |                   | $\sigma$<br>(mS cm <sup>-1</sup> ) |                   | $\sigma$ /IEC <sub>m</sub><br>(mS g/(cm mmol)) |                   | $\sigma$ /IEC <sub>wet</sub><br>(mS cm <sup>2</sup> /mmol) |                   |
|------------------------------|--------------------------------------------|-----------------------------------------------|-------------------|------------------------------------|-------------------|------------------------------------------------|-------------------|------------------------------------------------------------|-------------------|
|                              |                                            | 30 °C                                         | 80 °C             | 30 °C                              | 80 °C             | 30 °C                                          | 80 °C             | 30 °C                                                      | 80 °C             |
| QMPAES-X7Y10                 | 1.28                                       | 0.52                                          | 0.51              | 27.4                               | 85.0              | 21.4                                           | 66.4              | 52.7                                                       | 166.7             |
| QMPAES-X7Y13                 | 1.02                                       | 0.70                                          | 0.64              | 27.2                               | 51.9              | 26.7                                           | 50.9              | 38.9                                                       | 81.1              |
| QMPAES-X7Y17                 | 0.90                                       | 0.72                                          | 0.68              | 11.6                               | 38.7              | 12.9                                           | 43.0              | 16.1                                                       | 56.9              |
| QMPAES-X5Y10                 | 1.06                                       | 0.78                                          | 0.74              | 21.4                               | 58.0              | 20.2                                           | 54.7              | 27.4                                                       | 78.4              |
| QMPAES-X5Y13                 | 0.83                                       | 0.56                                          | 0.56              | 16.5                               | 44.1              | 19.9                                           | 53.1              | 29.5                                                       | 78.8              |
| QMPAES-X5Y17                 | 0.81                                       | 0.64                                          | 0.61              | 9.7                                | 23.0              | 12.0                                           | 28.4              | 15.2                                                       | 37.7              |
| QPAES-X8Y8 <sup>1</sup>      | 1.60                                       | 1.12 <sup>a</sup>                             | 1.05              | 18.3 <sup>a</sup>                  | 75.8              | 11.4 <sup>a</sup>                              | 47.4              | 16.3 <sup>a</sup>                                          | 72.2              |
| QPAES-X16Y8 <sup>1</sup>     | 1.24                                       | 0.62 <sup>a</sup>                             | 0.56              | 26.1 <sup>a</sup>                  | 51.5              | 21.0 <sup>a</sup>                              | 41.5              | 42.1 <sup>a</sup>                                          | 92.0              |
| QPAES-X16Y10 <sup>1</sup>    | 1.15                                       | 0.85 <sup>a</sup>                             | 0.77              | 11.8 <sup>a</sup>                  | 37.8              | 10.3 <sup>a</sup>                              | 32.9              | 13.9 <sup>a</sup>                                          | 49.1              |
|                              | 1.45                                       | 0.96 <sup>a</sup>                             | 0.84              | 15.4 <sup>a</sup>                  | 54.5              | 10.6 <sup>a</sup>                              | 37.6              | 16.0 <sup>a</sup>                                          | 64.9              |
| QPAES-X20Y18 <sup>1</sup>    | 1.54                                       | 0.98 <sup>a</sup>                             | 0.87              | 13.3 <sup>a</sup>                  | 64.1              | 8.6 <sup>a</sup>                               | 41.6              | 13.6 <sup>a</sup>                                          | 73.7              |
| QPAE-X15Y8 <sup>2</sup>      | 1.13                                       | 0.90 <sup>a</sup>                             | 0.77 <sup>c</sup> | 9.8 <sup>a</sup>                   | 27.6 <sup>c</sup> | 8.7 <sup>a</sup>                               | 24.4 <sup>c</sup> | 10.9 <sup>a</sup>                                          | 35.8 <sup>c</sup> |
| QPAE-X25Y21 <sup>2</sup>     | 1.45                                       | 1.07 <sup>a</sup>                             | 0.86 <sup>c</sup> | 16.9 <sup>a</sup>                  | 37.3 <sup>c</sup> | 11.7 <sup>a</sup>                              | 25.7 <sup>c</sup> | 15.8 <sup>a</sup>                                          | 43.4 <sup>c</sup> |
| QPE-X16Y11 <sup>3</sup>      | 0.79                                       | — <sup>d</sup>                                | — <sup>d</sup>    | — <sup>d</sup>                     | 8.8 <sup>c</sup>  | — <sup>d</sup>                                 | 11.1 <sup>c</sup> | — <sup>d</sup>                                             | — <sup>d</sup>    |
|                              | 1.13                                       | — <sup>d</sup>                                | — <sup>d</sup>    | — <sup>d</sup>                     | 47.0 <sup>c</sup> | — <sup>d</sup>                                 | 41.6 <sup>c</sup> | — <sup>d</sup>                                             | — <sup>d</sup>    |
|                              | 1.38                                       | — <sup>d</sup>                                | — <sup>d</sup>    | — <sup>d</sup>                     | 52.0 <sup>c</sup> | — <sup>d</sup>                                 | 37.7 <sup>c</sup> | — <sup>d</sup>                                             | — <sup>d</sup>    |
| QPE-X22Y11 <sup>3</sup>      | 0.86                                       | — <sup>d</sup>                                | — <sup>d</sup>    | — <sup>d</sup>                     | 25.0 <sup>c</sup> | — <sup>d</sup>                                 | 29.1 <sup>c</sup> | — <sup>d</sup>                                             | — <sup>d</sup>    |
| ds-PAES-75 <sup>4</sup>      | 1.49                                       | 1.27 <sup>b</sup>                             | 1.03              | 21.9 <sup>b</sup>                  | 47.3              | 14.7 <sup>b</sup>                              | 31.7              | 17.2 <sup>b</sup>                                          | 45.9              |
| 4(X35) <sup>5</sup>          | 1.01                                       | 1.14 <sup>a</sup>                             | — <sup>d</sup>    | 15 <sup>a</sup>                    | 24.6              | 14.9 <sup>a</sup>                              | 24.4              | 13.2 <sup>a</sup>                                          | — <sup>d</sup>    |
| 4(X50) <sup>5</sup>          | 1.32                                       | 1.40 <sup>a</sup>                             | — <sup>d</sup>    | 26 <sup>a</sup>                    | 40.0              | 19.7 <sup>a</sup>                              | 30.3              | 18.6 <sup>a</sup>                                          | — <sup>d</sup>    |
| ImPES-0.55 <sup>6</sup>      | 0.98                                       | 1.29                                          | — <sup>d</sup>    | 21.9                               | 51.7              | 22.3                                           | 52.8              | 17.0                                                       | — <sup>d</sup>    |
| ImPES-0.70 <sup>6</sup>      | 1.23                                       | 1.48                                          | — <sup>d</sup>    | 32.6                               | 69.2              | 26.5                                           | 56.3              | 22.0                                                       | — <sup>d</sup>    |
| PAES-Q-12 <sup>7</sup>       | 1.65                                       | — <sup>d</sup>                                | — <sup>d</sup>    | 22.9 <sup>a</sup>                  | 54.0              | 13.9 <sup>a</sup>                              | 32.7              | — <sup>d</sup>                                             | — <sup>d</sup>    |
| QA-PSf-g-PEG350 <sup>8</sup> | 1.36                                       | — <sup>d</sup>                                | — <sup>d</sup>    | 24.9 <sup>a</sup>                  | 70.2              | 18.3 <sup>a</sup>                              | 51.6              | — <sup>d</sup>                                             | — <sup>d</sup>    |

<sup>a</sup> Determined at 20 °C. <sup>b</sup> Determined at 25 °C. <sup>c</sup> Determined at 60 °C. <sup>d</sup> Not reported in the literature.

## II. Experimental section

### <sup>1</sup>H NMR characterization.

<sup>1</sup>H NMR spectras were recorded on a Bruker AVANCE 400S with tetramethylsilane (TMS) as the standard and CDCl<sub>3</sub> or DMSO-d<sub>6</sub> as the solvent.

### Atomic Force Microscopy (AFM) characterization.

Tapping mode Atomic Force Microscopy (AFM) was performed on a Bruker Multimode 8 scanning probe microscopy with a probe of MPP-11100-10 (40 N/m, 300 kHz). The scanning frequency is 1 Hz. The sample was equilibrated at 60% RH for more than 24 h before test.

## References

- 1 X. Li, Q. Liu, Y. Yu and Y. Meng, *J. Membr. Sci.*, 2014, **467**, 1-12.
- 2 X. Li, Y. Yu, Q. Liu and Y. Meng, *J. Membr. Sci.*, 2013, **436**, 202-212.
- 3 M. Tanaka, K. Fukasawa, E. Nishino, S. Yamaguchi, K. Yamada, H. Tanaka, B. Bae, K. Miyatake and M. Watanabe, *J. Am. Chem. Soc.*, 2011, **133**, 10646-10654.
- 4 X. Li, G. Nie, J. Tao, W. Wu, L. Wang and S. Liao, *ACS Appl. Mater. Interfaces*, 2014, **6**, 7585-7595.
- 5 N. Li, Q. Zhang, C. Wang, Y. M. Lee and M. D. Guiver, *Macromolecules*, 2012, **45**, 2411-2419.
- 6 Y. Zhuo, A. Lai, Q. Zhang, A. Zhu and M. Ye, Q. Liu, *J. Mater. Chem. A*, 2015, **3**, 18105-18114.
- 7 C. Wang, B. Shen, C. Xu, X. Zhao and J. Li, *J. Membr. Sci.*, 2015, **492**, 281-288.
- 8 S. He and C.W. Frank, *J. Mater. Chem. A*, 2014, **2**, 16489-16497.
